# Supplementary material for: The construction of a Fenton system to achieve in situ H2O2 generation and decomposition for enhanced photocatalytic performance
Source: Royal Society of Chemistry journal article supplement (doi:10.1039/c9qi00071b), 2019-01-01
Supplement: c9qi00071b1.pdf [file c9qi00071b1.pdf]

## SUPPORTING INFORMATION

### Construction a Fenton system to achieve the in-situ $H_2O_2$ generation and decomposition for enhanced photocatalytic performance

Yuanguo Xu,<sup>a</sup> Jie Liu,<sup>a</sup> Meng Xie,<sup>\*b</sup> Wei Wei,<sup>a</sup> Ting Zhou,<sup>a</sup> Jia Yan,<sup>c</sup> Hui Xu,<sup>c</sup> Haiyan Ji,<sup>c</sup> Huaming Li,<sup>\*c</sup> Jimin Xie,<sup>a</sup>

<sup>a</sup> School of Chemistry and Chemical Engineering, School of Pharmacy, Jiangsu University, Zhenjiang 212013, PR China.

<sup>b</sup> School of Pharmacy, Jiangsu University, Zhenjiang 212013, PR China.

<sup>c</sup> Institute for Energy Research, Jiangsu University, Zhenjiang 212013, PR China.

\*E-mail: xiemeng@ujs.edu.cn; lhm@ujs.edu.cn

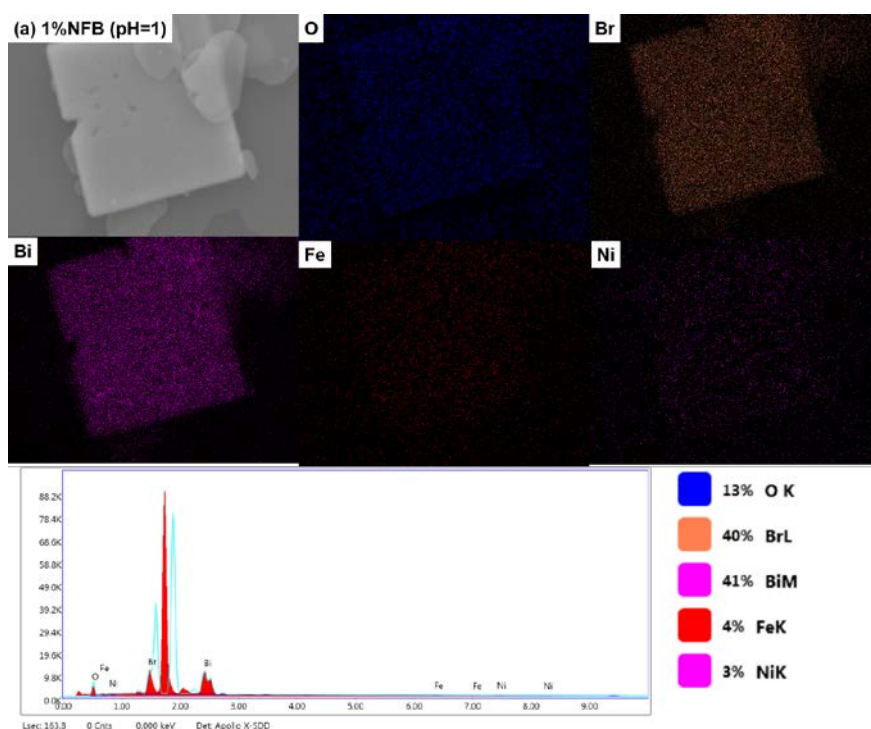

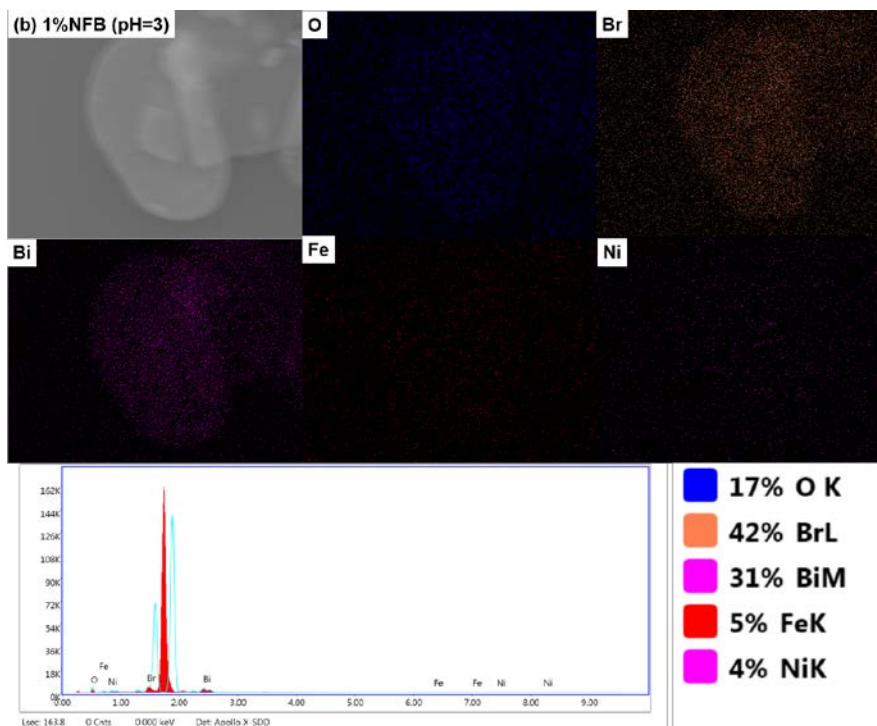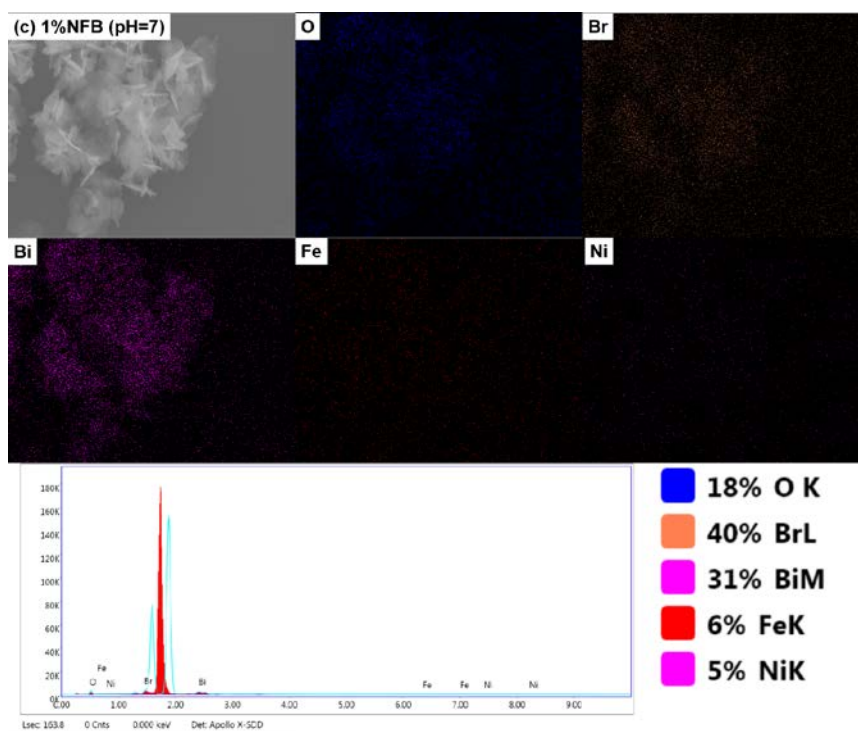

Figure. S1 Mapping and EDS analysis of different samples: (a) 1% NFB (pH=1); (b) 1% NFB (pH=3); (c) 1% NFB (pH=7)

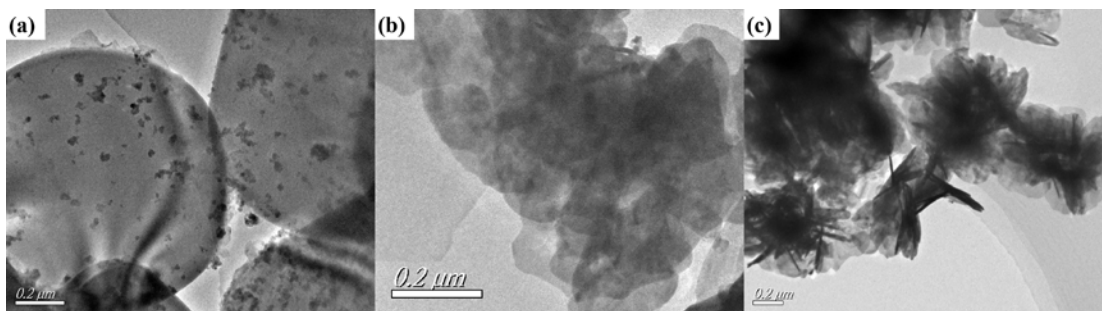

Figure. S2 The TEM images of 1% NFB in pH=1 (a); pH=3 (b); pH=7 (c).

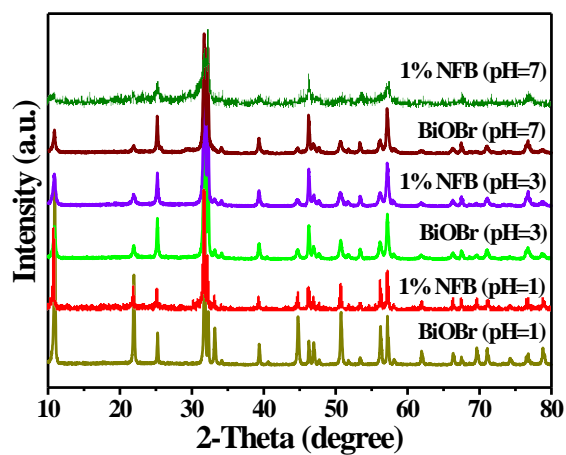

Figure. S3 The XRD patterns of BiOBr and 1% NFB (pH=1, 3 and 7)

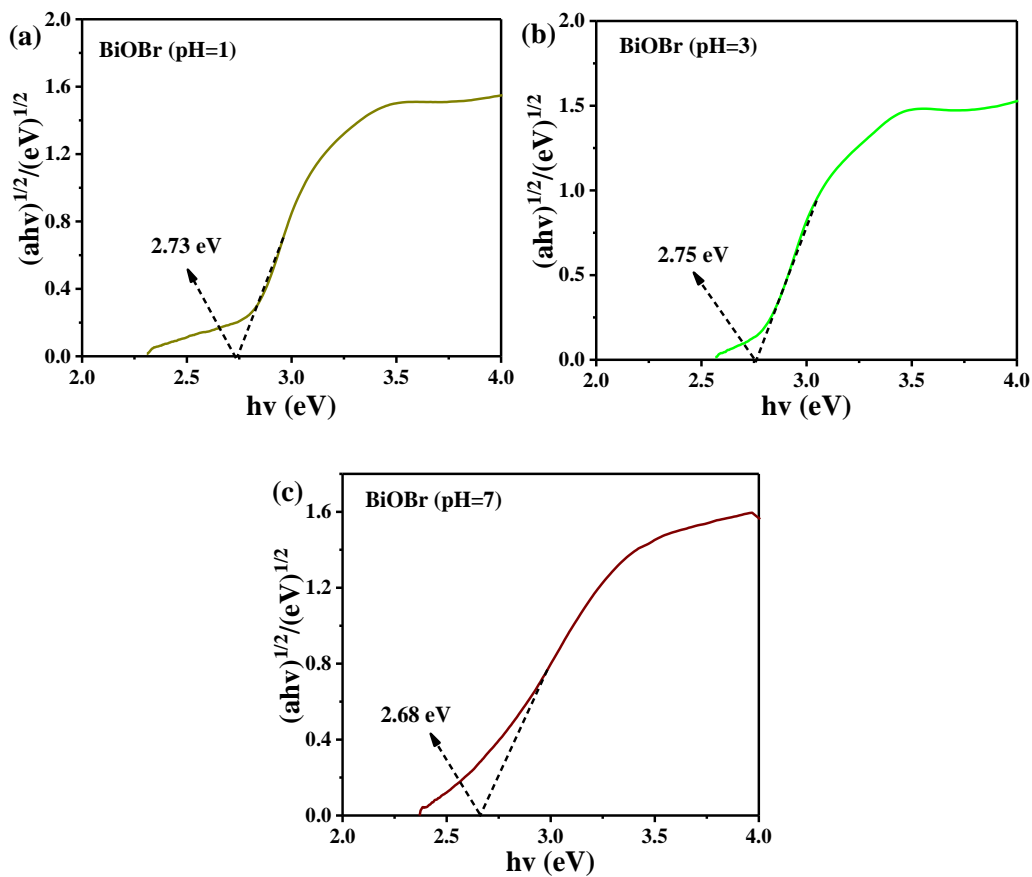

Figure. S4 Plots of  $(\alpha h\nu)^{1/2}$  versus  $h\nu$  of pure BiOBr with different pH.

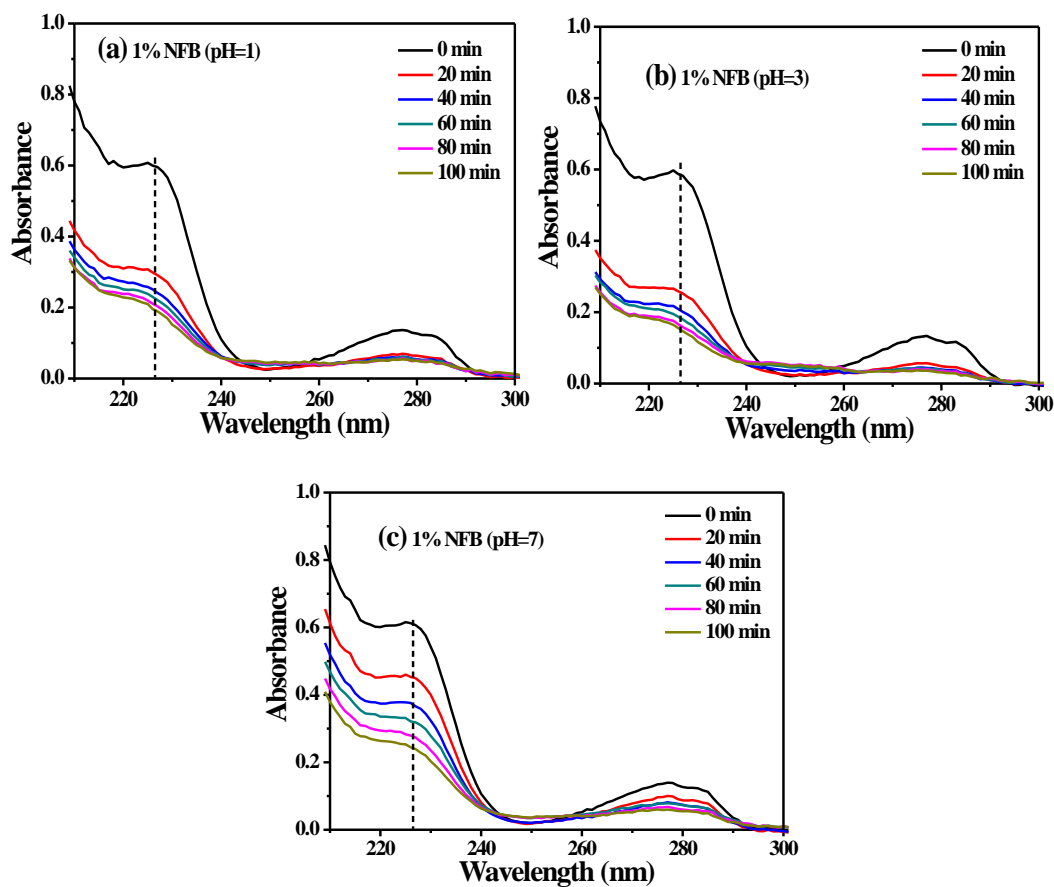

Figure. S5 UV-vis absorption spectra of BPA solution under different reaction time over the 1% NFB (pH=1, 3 and 7) composite materials.

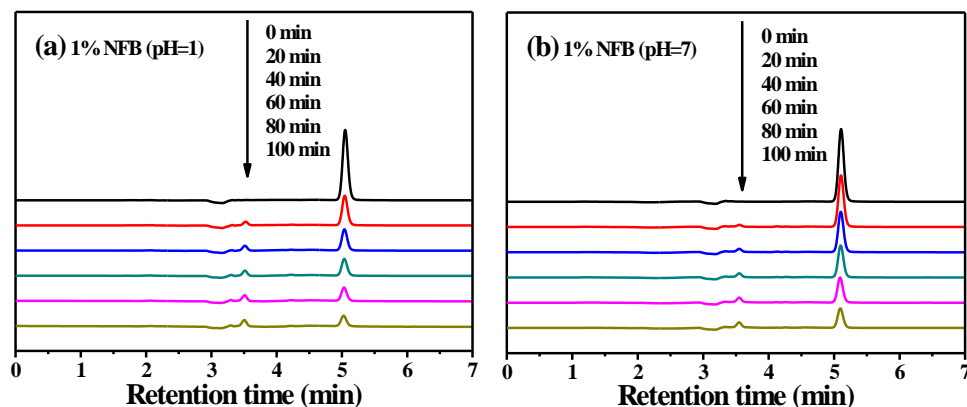

Figure. S6 HPLC chromatograms of the BPA degradation by the 1% NFB (pH=1 and 7) composite materials.

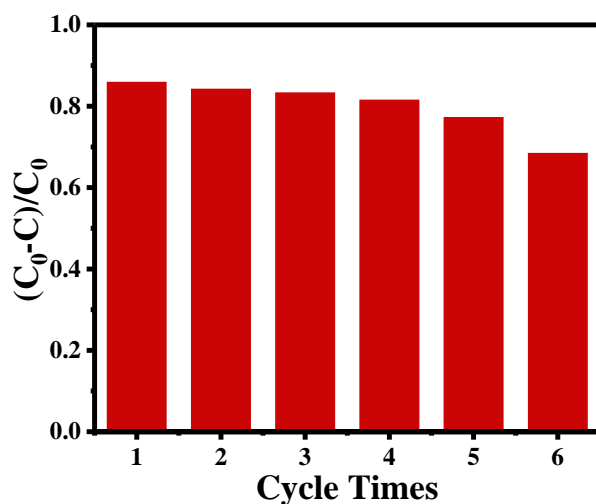

Figure. S7 Cycling runs for the photodegradation of BPA in the presence of 1% NFB (pH=3) composite under visible light irradiation.

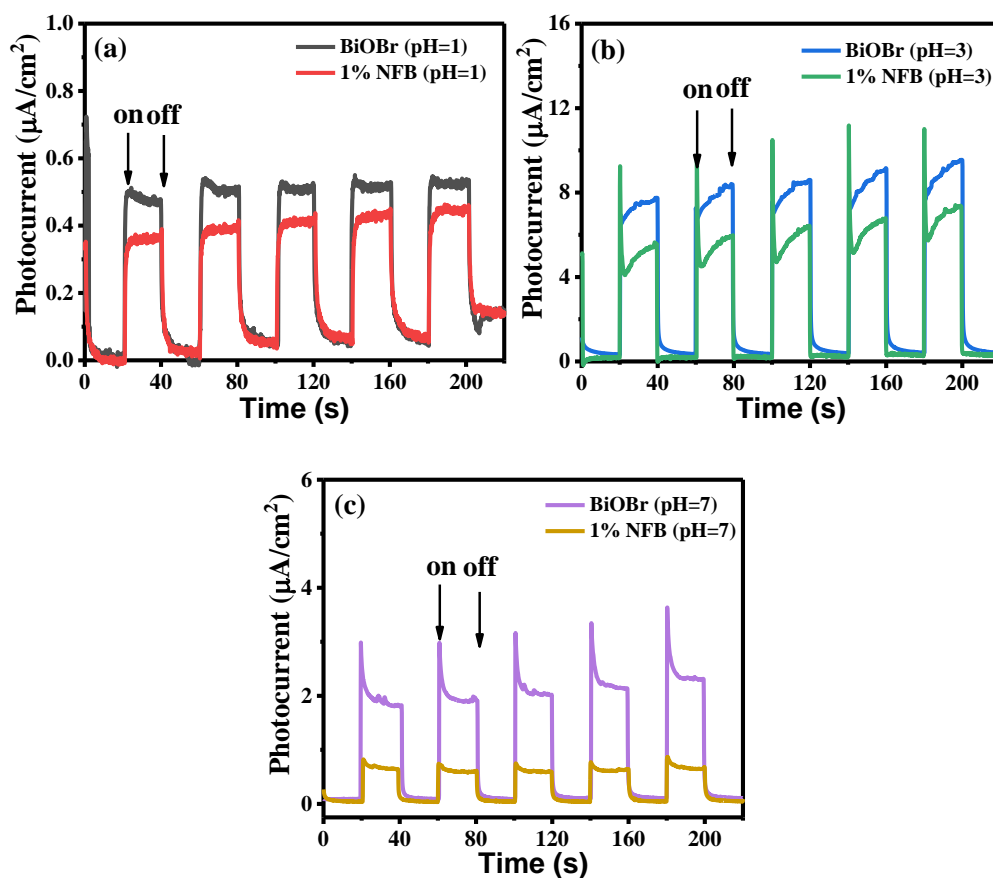

Figure. S8 Transient photocurrent response of the sample electrodes of BiOBr and 1% NFB in pH=1 (a); pH=3 (b) and pH=7 (c).

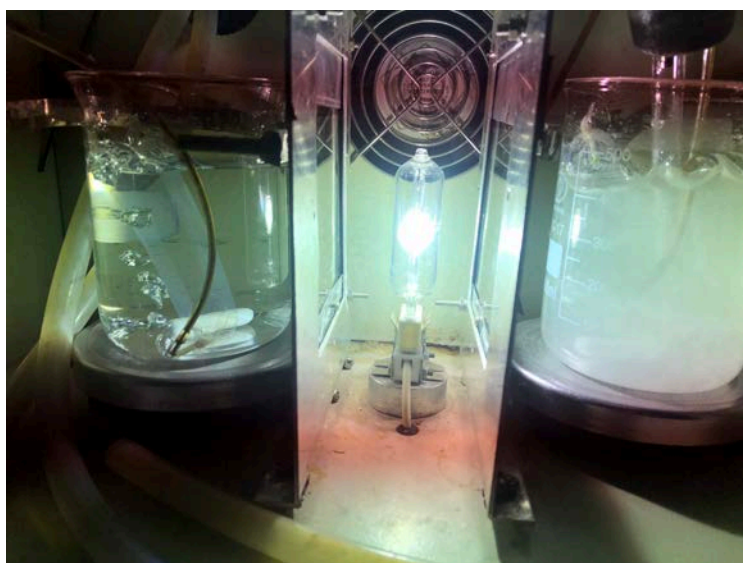

Figure. S9 Schematic illustration of partition system setup used in the photocatalytic BPA degradation.

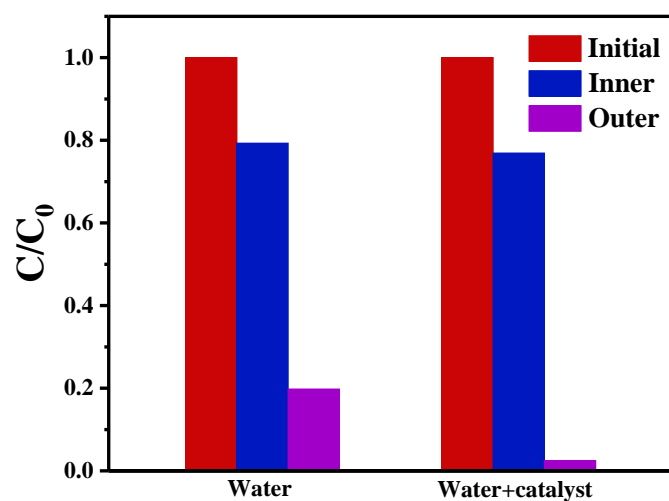

Figure. S10 Concentration of BPA in the inner and outer of the partition system with and without catalyst.
